# Supplementary material for: Robust Enhancement of Direct Air Capture of CO2 Efficiency Using Micro-Sized Anion Exchange Resin Particles
Source: MDPI journal article supplement (doi:10.3390/su16093601), 2024-04-25
Supplement: s1 [file s1]

## Supplement

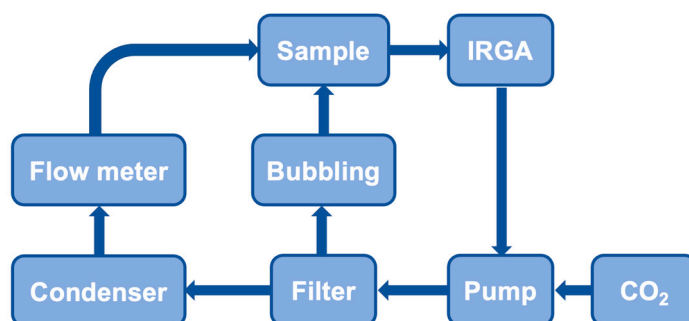

Figure S1. A simple schematic diagram of the experimental gas path.

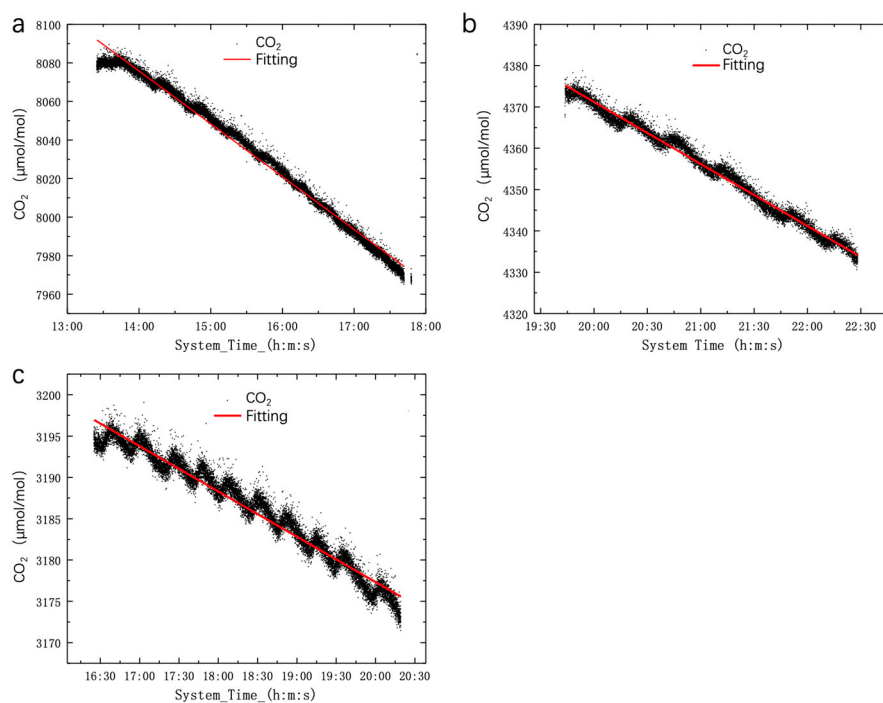

Figure S2. The device leakage rates are 8000ppm, 4500ppm, and 3000ppm respectively. The leakage rate at 3000ppm is 5ppm/h.

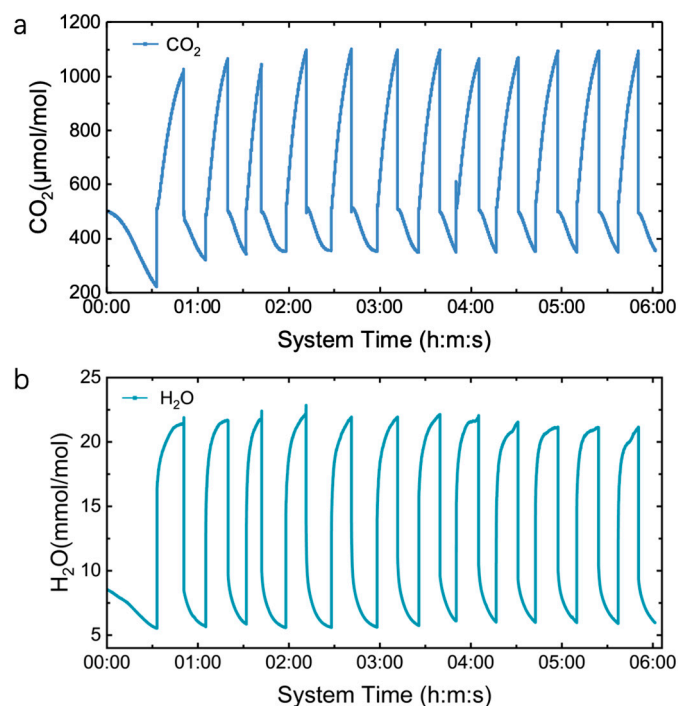

Figure S3. After the humidifier circuit is replaced with tap water, perform approximately ten cycles.

Table S1. The amine-based anion exchange resins, preparation method, particle size and CO<sub>2</sub> adsorption.<sup>1</sup>

| anion exchange<br>resins    | amine group      | particle size<br>(mm) | operating<br>temp (°C) | Capacity<br>(mmol/g) |
|-----------------------------|------------------|-----------------------|------------------------|----------------------|
| IRA-900 (0.074-<br>0.160mm) | quaternary amine | 0.65–0.82             | 60                     | 3.7                  |
| D201                        | quaternary amine | 0.315–1.25            | 75                     | 3.7                  |
| 717                         | quaternary amine | 0.3–1.2               | 60                     | 3.6                  |
| D301-R                      | tertiary amine   | 0.315–1.25            | 100                    | 4.8                  |
| D301-G                      | tertiary amine   | 0.6–1.6               | 100                    | 4.2                  |
| IRA67RF                     | tertiary amine   | 0.5–0.75              | 50                     | 5.0                  |

## Reference:

1. Wang, X. *et al.* CO<sub>2</sub> absorption over ion exchange resins: the effect of amine functional groups and microporous structures. *Industrial & engineering chemistry research* **59**, 16507–16515 (2020).
